# Supplementary material for: Molecular dynamics approach to understand the denaturing effect of a millimolar concentration of dodine on a λ-repressor and counteraction by trehalose
Source: Royal Society of Chemistry journal article supplement (doi:10.1039/c6cp08289k), 2017-01-01
Supplement: c6cp08289k1.pdf [file c6cp08289k1.pdf]

**Molecular dynamics approach to understand the denaturing effect  
of millimolar concentration of dodine on  $\lambda$ -repressor and  
counteraction by trehalose**

Gargi Borgohain, Bikramaditya Mandal, and Sandip Paul

*Department of Chemistry, Indian Institute of Technology, Guwahati Assam, India-781039*

(Dated: April 20, 2017)

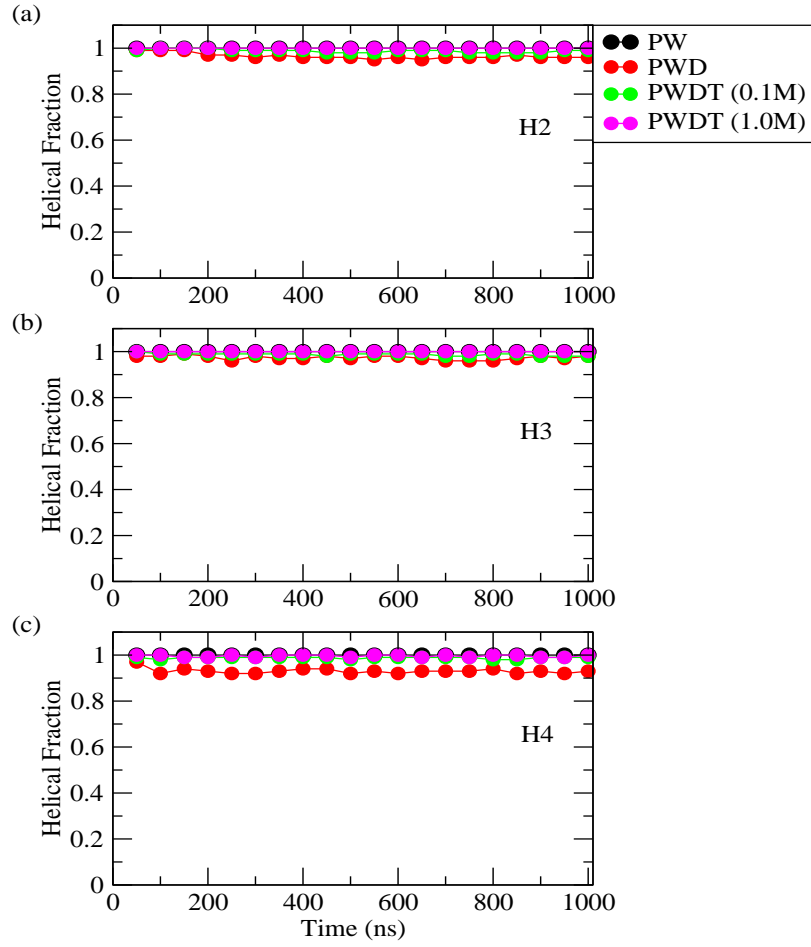

FIG. 1: Helical fractions versus simulation time for the helices H2 (a), H3 (b) and H4 (c) for the systems PW, PWD, PWDT (0.1 M) and PWDT (1.0 M).
